# Supplementary material
Source: PubMed Central journal article supplement (PMC3965577)

Supplemental Figure 1

A)

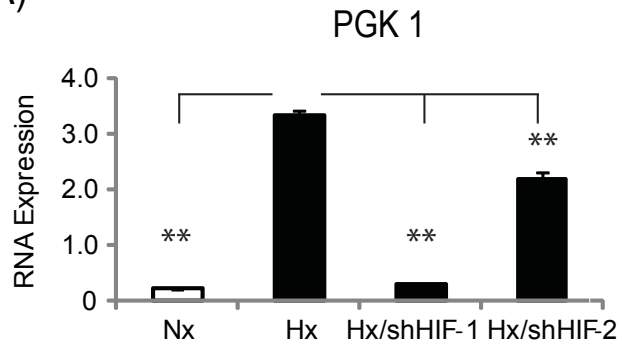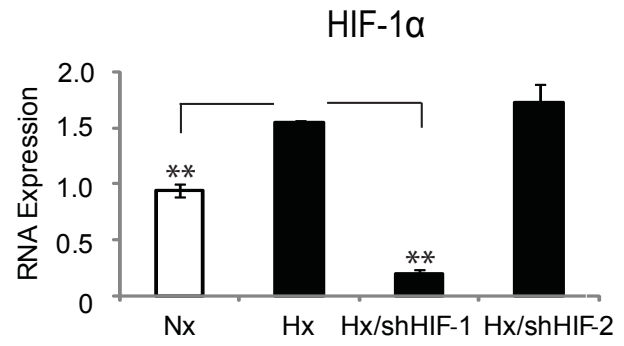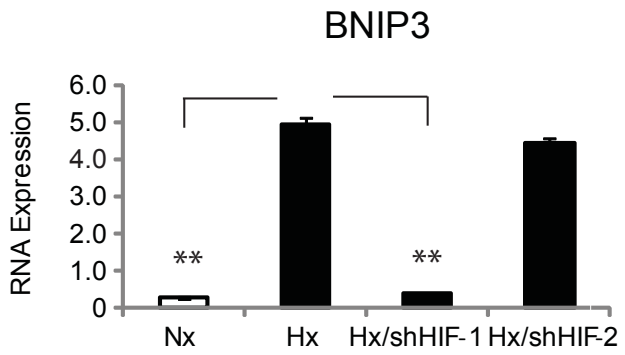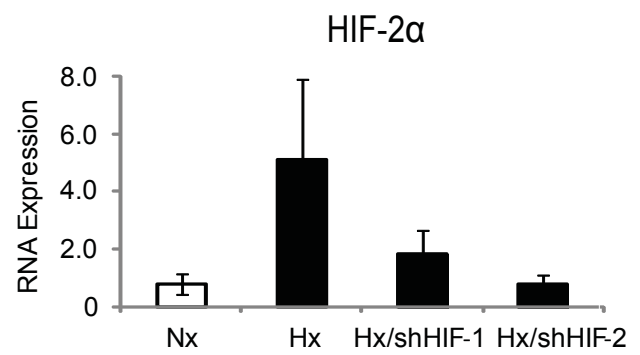

Supplement: NIHMS516237-supplement-Supplementary_Figure_1.pdf [file NIHMS516237-supplement-Supplementary_Figure_1.pdf]

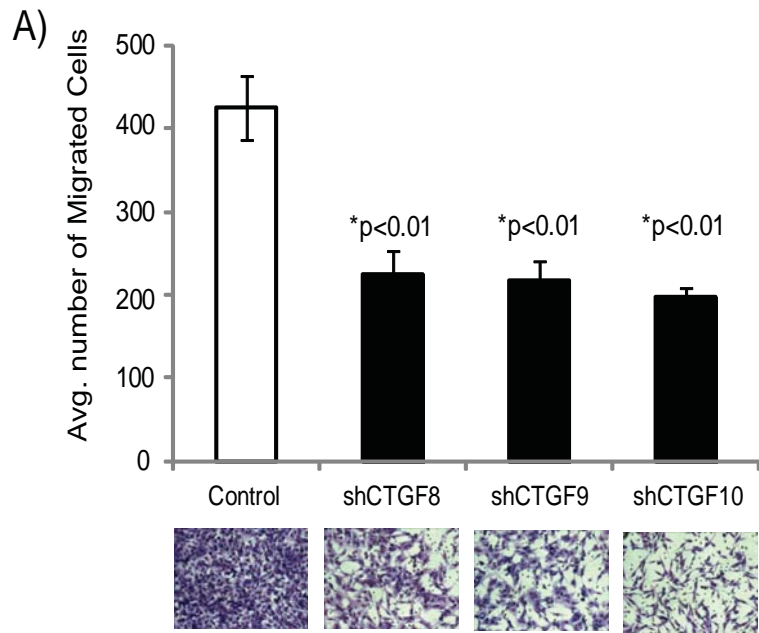

Supplement: NIHMS516237-supplement-Supplementary_Figure_2.pdf [file NIHMS516237-supplement-Supplementary_Figure_2.pdf]

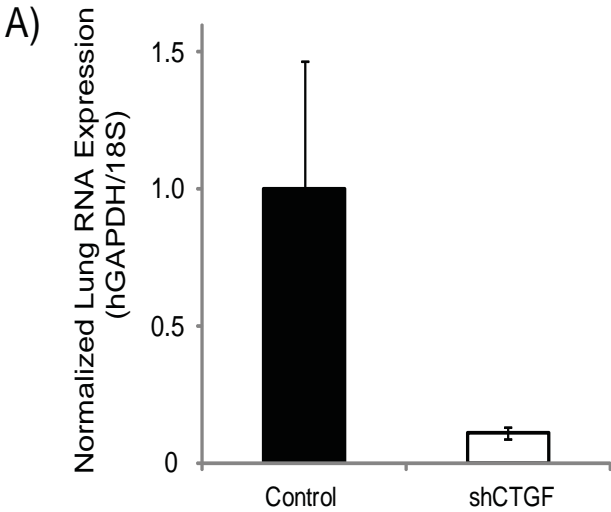

Supplement: NIHMS516237-supplement-Supplementary_Figure_3.pdf [file NIHMS516237-supplement-Supplementary_Figure_3.pdf]
